# Supplementary material for: Lactobacillus acidophilus KLDS1.0901 ameliorates non-alcoholic fatty liver disease by modulating the tryptophan metabolite indole-3-aldehyde and acting on its receptor AhR
Source: Royal Society of Chemistry journal article supplement (doi:10.1039/d4fo05280c), 2025-01-01
Supplement: d4fo05280c1.pdf [file d4fo05280c1.pdf]

**Table S1** Feed formula of mice

| Ingredient                            | D12450B control feed |      | D12492 high fat feed |       |
|---------------------------------------|----------------------|------|----------------------|-------|
|                                       | gm                   | Kcal | gm                   | Kcal  |
| Casein, 80mesh                        | 200                  | 800  | 200                  | 800   |
| L-Cystine                             | 3                    | 12   | 3                    | 12    |
| Corn starch                           | 315                  | 1260 | 0                    | 0     |
| Maltodextrin 10                       | 35                   | 140  | 125                  | 500   |
| Sucrose                               | 350                  | 1400 | 68.8                 | 275.2 |
| Cellulose BW20                        | 50                   | 0    | 50                   | 0     |
| Soybean oil                           | 25                   | 255  | 25                   | 225   |
| Lard                                  | 20                   | 180  | 245                  | 2205  |
| Mineral mix S10026                    | 10                   | 0    | 10                   | 0     |
| Dicalcium phosphate                   | 13                   | 0    | 13                   | 0     |
| Calcium carbonate                     | 5.5                  | 0    | 5.5                  | 0     |
| Potassium citrate, 1 H <sub>2</sub> O | 16.5                 | 0    | 16.5                 | 0     |
| Vitamin mix V10001                    | 10                   | 10   | 10                   | 40    |
| Choline bitartrate                    | 2                    | 0    | 2                    | 0     |
| FD&C yellow dye # 5                   | 0.05                 | 0    |                      | 0     |
| FD&C blue dye # 1                     |                      | 0    | 0.05                 | 0     |
| Total                                 | 1055.05              | 4057 | 773.85               | 4057  |

**Average daily food intake of mice in all the groups.**

There was no statistically significant difference in dietary intake between the control group and all groups treated with HFD ( $P > 0.05$ ). At the mean level, there was a trend toward lower dietary intake for all groups on the HFD diet, but this still indicates that HFD did not significantly reduce appetite.

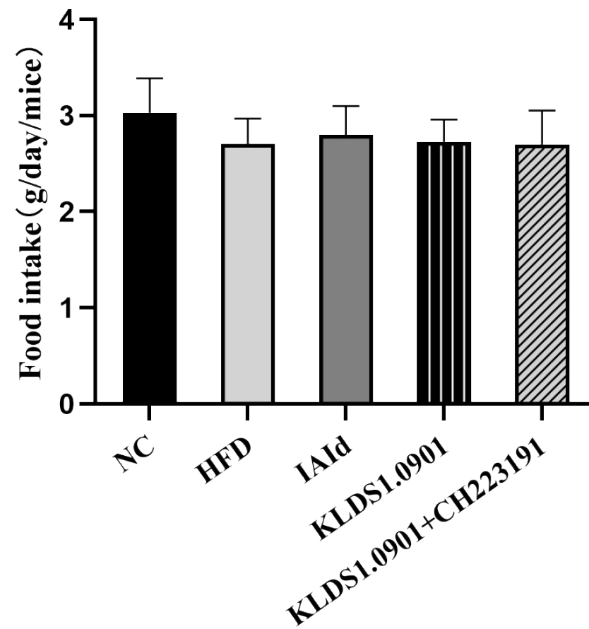

Supplementary Figure 1. Average daily food intake of mice in all the groups.

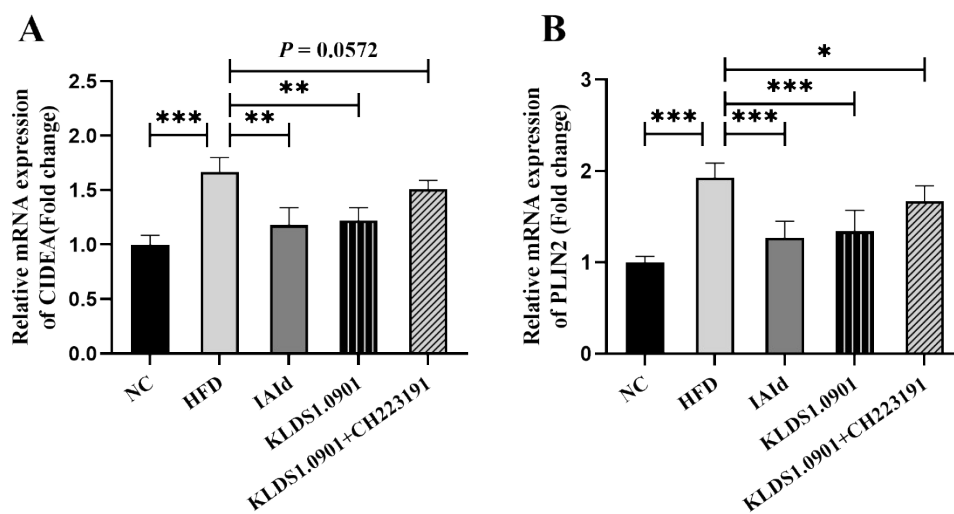

Supplementary Figure 2. Relative mRNA expression of biomarker genes for fat droplet formation
